# Supplementary material for: De Novo Assembly of the Complete Genome of an Enhanced Electricity-Producing Variant of Geobacter sulfurreducens Using Only Short Reads
Source: PLoS One. 2010 Jun 8;5(6):e10922. doi: 10.1371/journal.pone.0010922 (PMC2882325; doi:10.1371/journal.pone.0010922)
Supplement: Table S2 — A: Sequence and location of primers. (Lower case denotes reverse complement.) B: Primer pairs and product analysis of each PCR. (0.03 MB XLS) [file pone.0010922.s004.xls]

## Sheet: Table S2A
Table S2A: Sequence and location of primers.(Lower case denotes reverse complement)
Primer Name	Sequence	Location,Scaffold
B2F(b1R)	TCAGCAACTCCCCTACTCCCATCA	end,B (beginning,b)
B1R(b2F)	CATCATCTCGCCTGCCGTGTCA	beginning B,(end b)
A2F	CTGGCGAAGGCGAACTGAAAGAC	end,A
A1R	TGACGCGACTCCTGATTGACCTC	beginning,A
C2F(c1R)	CGTGAAGCGATGTGCGAACTGAAC	end,C (beginning,c)
C1R(c2F)	GGGGCTCGTGAAGTCCAACAGTGA	beginning C,(end c)

## Sheet: Table S2B
Table S2B: Primer pairs and product analysis of each PCR
PCR	Primer pairs	Product Observed (Y/N)	Amplicon size(if observed)
BB/bb	B2F,B2R	No	NA
Bb	B2F,b1R	No	NA
bB	b2F,B1R	No	NA
Ab	A2F,b1R	No	NA
BC	B2F,C1R	No	NA
cB	c2F,B1R	Yes	351bp
AB	A2F,B1R	Yes	313bp
Bc	B2F,c1R	Yes	387bp
BA	B2F,A1R	Yes	404bp
